# Supplementary material for: A Cell-Based Small Molecule Screening Method for Identifying Inhibitors of Epithelial-Mesenchymal Transition in Carcinoma
Source: PubMed Central journal article supplement (PMC3303807; doi:10.1371/journal.pone.0033183), 2012-03-14
Supplement: pone.0033183.s003.pdf [file pone.0033183.s003.pdf]

Table S1

| Compound Name                         | EGF (20 ng/ml) |      |               |      | HGF (4 ng/ml) |      |               |      | IGF-1 (150 ng/ml) |      |               |      |
|---------------------------------------|----------------|------|---------------|------|---------------|------|---------------|------|-------------------|------|---------------|------|
|                                       | Cpd (1.67 µM)  |      | Cpd (6.67 µM) |      | Cpd (1.67 µM) |      | Cpd (6.67 µM) |      | Cpd (1.67 µM)     |      | Cpd (6.67 µM) |      |
|                                       | CCR            | CDR% | CCR           | CDR% | CCR           | CDR% | CCR           | CDR% | CCR               | CDR% | CCR           | CDR% |
| (-)-Terreic acid                      | 4.2            | 113  | 3.1           | 73   | 3.7           | 78   | 2.8           | 73   | 3.5               | 97   | 1.9           | 68   |
| (±)-Palmitoylcarnitine chloride       | 3.8            | 133  | 3.8           | 121  | 3.8           | 88   | 3.8           | 88   | 3.5               | 108  | 3.4           | 95   |
| 1,2,3,4,5,6-Hexabromocyclohexane      | 4.2            | 97   | 4.0           | 121  | 3.5           | 88   | 3.7           | 85   | 3.6               | 102  | 3.7           | 95   |
| 10-DEBC hydrochloride                 | 4.1            | 96   | 1.0           | -33  | 3.7           | 90   | 1.0           | -10  | 3.3               | 102  | 0.8           | -13  |
| 4-Chlorophenylguanidine hydrochloride | 3.9            | 121  | 4.1           | 118  | 3.7           | 80   | 3.7           | 80   | 3.6               | 99   | 3.5           | 100  |
| 5-Azacytidine                         | 2.9            | 94   | 2.0           | 45   | 3.4           | 87   | 2.2           | 25   | 3.2               | 59   | 2.4           | 51   |
| 8-Bromo-cAMP, sodium salt             | 3.9            | 123  | 4.2           | 114  | 3.8           | 87   | 3.9           | 96   | 3.6               | 109  | 3.5           | 92   |
| A-3 hydrochloride                     | 4.0            | 114  | 4.1           | 116  | 3.9           | 87   | 3.5           | 91   | 3.4               | 102  | 3.3           | 106  |
| A83-01                                | 4.0            | 30   | 3.8           | 34   | 3.1           | 29   | 3.0           | 25   | 3.5               | 37   | 3.1           | 32   |
| ABT-702 dihydrochloride               | 4.0            | 112  | 3.6           | 71   | 4.1           | 87   | 4.0           | 55   | 3.5               | 92   | 3.4           | 63   |
| ABT-737                               | 3.9            | 105  | 4.1           | 96   | 3.4           | 109  | 3.7           | 112  | 3.3               | 101  | 3.5           | 107  |
| ABT-869                               | 3.7            | 78   | 2.0           | 46   | 3.1           | 108  | 1.7           | 48   | 4.1               | 95   | 1.7           | 29   |
| ABT-888                               | 3.6            | 82   | 3.3           | 82   | 2.4           | 115  | 2.3           | 109  | 3.9               | 99   | 3.7           | 102  |
| AC 220                                | 2.2            | 80   | 2.2           | 62   | 2.5           | 70   | 2.1           | 102  | 2.6               | 76   | 2.3           | 82   |
| AG 13958                              | 2.7            | 129  | 1.6           | 44   | 3.4           | 61   | 1.8           | 51   | 2.6               | 52   | 1.8           | 43   |
| AG 1478 hydrochloride                 | 2.7            | 21   | 2.5           | 11   | 2.8           | 67   | 2.8           | 65   | 3.0               | 72   | 3.0           | 68   |
| AG 18                                 | 4.0            | 106  | 3.4           | 106  | 3.6           | 84   | 3.2           | 101  | 3.6               | 82   | 2.9           | 84   |
| AG 213                                | 4.0            | 131  | 4.0           | 100  | 3.9           | 89   | 4.1           | 101  | 3.6               | 88   | 3.4           | 84   |
| AG 490                                | 4.0            | 95   | 3.7           | 100  | 3.5           | 90   | 3.3           | 82   | 3.5               | 96   | 2.7           | 115  |
| AG 494                                | 4.2            | 106  | 3.3           | 110  | 3.8           | 94   | 3.0           | 95   | 3.6               | 93   | 2.1           | 109  |
| AG 555                                | 4.0            | 111  | 3.7           | 108  | 3.5           | 75   | 3.2           | 85   | 3.6               | 101  | 2.4           | 113  |
| AG 556                                | 3.9            | 126  | 3.7           | 107  | 3.5           | 86   | 3.1           | 80   | 3.3               | 118  | 2.8           | 91   |
| AG 825                                | 3.9            | 141  | 3.9           | 119  | 3.8           | 80   | 3.9           | 92   | 3.5               | 106  | 3.7           | 89   |
| AG 99                                 | 3.9            | 144  | 4.1           | 137  | 3.9           | 95   | 4.1           | 105  | 3.6               | 102  | 3.7           | 96   |
| Akt-I-1                               | 3.8            | 90   | 3.8           | 102  | 3.4           | 92   | 3.3           | 96   | 3.3               | 103  | 3.3           | 86   |
| Akt-I-1,2                             | 3.4            | 88   | 2.9           | 44   | 3.0           | 102  | 2.5           | 107  | 4.0               | 102  | 3.4           | 69   |
| AMG-47a                               | 1.2            | -33  | 1.0           | -45  | 1.4           | -30  | 1.1           | -42  | 1.1               | -7   | 1.0           | -16  |
| AMG-Tie2-1                            | 4.2            | 97   | 1.8           | -15  | 3.6           | 76   | 1.9           | -9   | 3.5               | 94   | 1.8           | 11   |
| Aminopurvalanol A                     | 3.4            | 100  | 1.3           | 11   | 2.9           | 44   | 1.3           | -20  | 2.6               | 37   | 1.1           | -10  |
| Anisomycin                            | 0.9            | -5   | 0.8           | -23  | 0.9           | 4    | 0.8           | -21  | 0.7               | 23   | 0.6           | 21   |
| API-2                                 | 2.1            | 40   | 1.9           | 23   | 2.6           | 41   | 2.3           | 30   | 2.0               | 53   | 1.8           | 45   |
| Apigenin                              | 3.9            | 117  | 3.8           | 134  | 3.5           | 83   | 3.8           | 94   | 3.5               | 106  | 3.5           | 113  |
| Arcyriaflavin A                       | 4.1            | 118  | 3.6           | 127  | 3.6           | 81   | 3.7           | 87   | 3.5               | 101  | 3.5           | 94   |
| AS-101                                | 4.0            | 117  | 4.0           | 107  | 4.1           | 91   | 4.1           | 102  | 3.6               | 99   | 3.5           | 106  |
| AS-252424                             | 3.8            | 121  | 3.2           | 115  | 3.5           | 101  | 3.1           | 103  | 3.3               | 109  | 3.1           | 103  |
| AT-7519                               | 3.9            | 100  | 0.8           | -48  | 2.7           | 107  | 0.8           | -43  | 3.2               | 128  | 0.7           | -15  |
| AT-9283                               | 1.1            | -2   | 0.6           | -47  | 1.1           | 2    | 0.5           | -39  | 1.0               | 2    | 0.7           | -17  |
| AV-412                                | 0.8            | -7   | 0.4           | -59  | 0.7           | -22  | 0.4           | -47  | 1.1               | 61   | 0.5           | -26  |
| AV-951                                | 3.0            | 99   | 1.1           | 61   | 2.0           | 126  | 1.1           | 43   | 3.6               | 116  | 1.2           | 38   |
| Axitinib                              | 1.1            | 96   | 1.1           | 96   | 0.7           | 115  | 0.9           | 106  | 1.2               | 104  | 1.2           | 86   |
| AZ-960                                | 1.2            | -10  | 0.9           | -40  | 1.1           | 3    | 1.0           | -23  | 1.1               | 3    | 0.9           | -14  |
| AZD0530                               | 3.1            | 15   | 1.9           | -32  | 2.8           | 30   | 1.9           | -11  | 2.2               | 11   | 1.7           | -8   |
| AZD2281                               | 3.2            | 82   | 2.1           | 73   | 2.3           | 109  | 1.7           | 107  | 3.3               | 108  | 2.5           | 99   |
| AZD6244                               | 3.4            | 28   | 2.8           | 9    | 3.1           | 48   | 3.0           | 33   | 2.8               | 44   | 2.6           | 44   |
| AZD7762                               | 0.8            | -13  | 0.7           | -39  | 0.8           | -20  | 0.7           | -36  | 0.8               | -15  | 0.6           | -21  |
| Bax channel blocker                   | 2.9            | 109  | 0.4           | -47  | 3.4           | 81   | 0.3           | -45  | 2.8               | 78   | 0.3           | -13  |
| Bay 11-7085                           | 2.9            | 78   | 1.1           | -41  | 2.9           | 80   | 0.8           | -25  | 1.9               | 55   | 1.0           | -19  |
| Bay 11-7821                           | 3.0            | 78   | 1.1           | -42  | 3.1           | 85   | 1.0           | -39  | 1.7               | 53   | 1.1           | -18  |
| Belinostat (PXD101)                   | 0.7            | -27  | 0.7           | -7   | 0.8           | -13  | 0.6           | -33  | 0.8               | 10   | 0.7           | 2    |
| BEZ235                                | 1.4            | 36   | 1.2           | 20   | 1.4           | 38   | 1.3           | 22   | 1.5               | 65   | 1.3           | 38   |
| BI-2536 (R-)                          | 0.9            | -28  | 0.8           | -37  | 0.8           | -26  | 0.8           | -11  | 0.9               | -4   | 0.8           | -9   |
| BIBU 1361 dihydrochloride             | 3.3            | 35   | 0.6           | -41  | 3.0           | 74   | 0.6           | -31  | 3.0               | 74   | 0.9           | -7   |
| BIBX 1382 dihydrochloride             | 3.9            | 62   | 2.3           | 4    | 3.1           | 80   | 2.5           | 61   | 3.0               | 75   | 2.5           | 62   |
| BI-D1870                              | 2.4            | 73   | 1.1           | -34  | 2.3           | -1   | 1.0           | -33  | 2.3               | 24   | 1.0           | -12  |
| Bisindoylmaleimide X HCl salt         | 2.9            | 128  | 0.5           | -46  | 3.0           | 79   | 0.5           | -37  | 3.2               | 78   | 0.6           | -15  |
| BMS-2                                 | 3.5            | 92   | 3.6           | 84   | 3.6           | 93   | 3.8           | 96   | 4.2               | 89   | 4.2           | 84   |
| BMS-3                                 | 1.1            | 28   | 1.2           | 29   | 1.2           | 33   | 1.2           | 36   | 1.2               | 46   | 1.3           | 62   |
| BMS-5                                 | 3.1            | 110  | 3.2           | 86   | 4.0           | 81   | 3.3           | 81   | 3.8               | 85   | 3.1           | 86   |

| Compound Name                     | EGF (20 ng/ml) |      |               |      | HGF (4 ng/ml) |      |               |      | IGF-1 (150 ng/ml) |      |               |      |
|-----------------------------------|----------------|------|---------------|------|---------------|------|---------------|------|-------------------|------|---------------|------|
|                                   | Cpd (1.67 µM)  |      | Cpd (6.67 µM) |      | Cpd (1.67 µM) |      | Cpd (6.67 µM) |      | Cpd (1.67 µM)     |      | Cpd (6.67 µM) |      |
|                                   | CCR            | CDR% | CCR           | CDR% | CCR           | CDR% | CCR           | CDR% | CCR               | CDR% | CCR           | CDR% |
| BMS-536924                        | 3.6            | 82   | 3.0           | 42   | 3.6           | 89   | 2.6           | 24   | 2.1               | 26   | 1.9           | 7    |
| BMS-599626                        | 3.5            | 66   | 3.0           | 28   | 2.4           | 120  | 1.9           | 91   | 3.5               | 103  | 2.9           | 84   |
| Bosutinib (SKI-606)               | 1.6            | -27  | 0.8           | -43  | 1.6           | -21  | 0.9           | -35  | 1.5               | -3   | 1.0           | -13  |
| BX-795                            | 1.1            | 78   | 1.0           | 34   | 0.8           | 108  | 1.0           | 37   | 1.1               | 105  | 1.1           | 103  |
| BX-912                            | 1.8            | 71   | 1.1           | 83   | 1.6           | 86   | 1.0           | 62   | 1.8               | 72   | 1.1           | 52   |
| C-1                               | 4.2            | 118  | 4.6           | 101  | 3.9           | 98   | 4.3           | 106  | 3.7               | 104  | 3.8           | 83   |
| Camostat mesylate                 | 3.8            | 96   | 3.6           | 90   | 2.6           | 124  | 2.3           | 99   | 3.9               | 112  | 4.1           | 103  |
| Cantharidin                       | 3.5            | 76   | 0.6           | -47  | 3.6           | 70   | 0.7           | -29  | 2.5               | 56   | 0.6           | -19  |
| CC-401                            | 3.9            | 135  | 3.9           | 118  | 3.3           | 81   | 2.8           | 61   | 3.5               | 88   | 2.7           | 56   |
| Cediranib (AZD2171)               | 2.6            | 81   | 0.8           | -20  | 2.6           | 112  | 0.7           | -27  | 3.9               | 87   | 0.8           | 9    |
| Ceramide                          | 4.0            | 120  | 3.6           | 131  | 3.8           | 93   | 3.7           | 93   | 3.5               | 111  | 3.3           | 98   |
| Chelerythrine chloride            | 4.3            | 106  | 0.6           | -49  | 3.9           | 92   | 0.3           | -36  | 3.5               | 80   | 0.5           | -32  |
| CHIR-258                          | 1.6            | 70   | 1.0           | -12  | 1.7           | 49   | 0.9           | -19  | 1.5               | 29   | 0.9           | 4    |
| CI-1033                           | 2.4            | -12  | 0.9           | -36  | 2.7           | 71   | 0.9           | -7   | 2.8               | 56   | 0.9           | 17   |
| CI-1040 (PD 184352)               | 3.5            | 30   | 2.3           | -1   | 3.1           | 50   | 2.5           | 25   | 2.9               | 46   | 2.2           | 38   |
| Clofarabine                       | 1.7            | 60   | 1.3           | 14   | 1.6           | 52   | 1.3           | 46   | 1.4               | 56   | 1.0           | 35   |
| CMPD-1                            | 3.3            | 99   | 1.8           | -1   | 3.3           | 74   | 2.0           | 4    | 3.0               | 87   | 1.4           | 2    |
| CP-690550                         | 4.0            | 109  | 3.7           | 109  | 3.5           | 81   | 3.5           | 78   | 3.5               | 108  | 3.7           | 106  |
| CP-724714                         | 2.6            | 89   | 2.4           | 62   | 2.6           | 98   | 2.6           | 105  | 3.4               | 83   | 3.2           | 75   |
| CYC-116                           | 0.9            | 112  | 1.1           | 31   | 1.1           | 4    | 1.0           | -31  | 1.1               | 66   | 1.0           | -4   |
| Cyclopamine                       | 4.0            | 126  | 3.9           | 129  | 4.0           | 88   | 3.7           | 89   | 3.5               | 102  | 3.4           | 115  |
| Cyclosporin A                     | 3.8            | 131  | 3.4           | 85   | 3.8           | 88   | 3.6           | 64   | 3.5               | 78   | 3.4           | 51   |
| CYT11387                          | 2.3            | 110  | 0.8           | 25   | 2.7           | 88   | 0.9           | 33   | 2.5               | 114  | 0.9           | 58   |
| D4476                             | 4.5            | 48   | 4.1           | 36   | 3.8           | 48   | 3.4           | 31   | 3.8               | 45   | 3.5           | 42   |
| Dasatinib                         | 1.3            | -30  | 1.3           | -41  | 1.3           | -28  | 1.2           | -33  | 1.1               | -14  | 1.3           | -16  |
| Deforolimus                       | 2.1            | 98   | 2.1           | 84   | 2.0           | 108  | 1.7           | 99   | 2.3               | 107  | 2.3           | 86   |
| Demethylasterriquinone B1         | 3.7            | 144  | 1.3           | -20  | 3.6           | 89   | 1.2           | -15  | 2.9               | 110  | 1.2           | -3   |
| D-erythro-Sphingosine (synthetic) | 3.9            | 128  | 3.8           | 125  | 3.5           | 78   | 3.6           | 80   | 3.6               | 92   | 3.7           | 87   |
| Dibutyryl-cAMP, sodium salt       | 3.8            | 125  | 4.1           | 117  | 3.7           | 83   | 3.7           | 86   | 3.5               | 100  | 3.6           | 110  |
| Dihydrosphingosine                | 3.9            | 142  | 4.0           | 118  | 3.7           | 87   | 3.8           | 91   | 3.5               | 98   | 3.5           | 98   |
| DL-AP4                            | 3.8            | 130  | 3.8           | 122  | 3.9           | 92   | 3.9           | 83   | 3.6               | 101  | 3.6           | 102  |
| DMNB                              | 4.1            | 125  | 4.0           | 112  | 3.5           | 87   | 3.8           | 91   | 3.6               | 108  | 3.6           | 95   |
| DMPQ dihydrochloride              | 3.9            | 117  | 3.9           | 133  | 3.9           | 87   | 3.7           | 79   | 3.5               | 99   | 3.6           | 97   |
| E7080                             | 3.3            | 74   | 2.5           | 92   | 3.3           | 115  | 2.9           | 81   | 4.4               | 84   | 3.5           | 72   |
| Enzastaurin                       | 3.5            | 119  | 3.5           | 90   | 2.2           | 131  | 2.0           | 113  | 4.0               | 113  | 3.4           | 96   |
| ER 27319 maleate                  | 2.0            | 77   | 0.8           | 6    | 2.0           | 100  | 0.8           | -17  | 1.8               | 91   | 0.7           | -13  |
| Erlotinib Hydrochloride           | 3.4            | 39   | 2.8           | 18   | 2.7           | 70   | 3.0           | 96   | 3.0               | 89   | 3.1           | 90   |
| Fasudil hydrochloride             | 3.8            | 131  | 4.2           | 116  | 3.8           | 79   | 4.4           | 86   | 3.7               | 93   | 4.1           | 84   |
| Flavopiridol                      | 0.8            | -15  | 0.8           | -35  | 0.8           | -19  | 0.8           | 6    | 0.7               | -13  | 0.8           | -11  |
| FPA124                            | 3.9            | 121  | 3.9           | 117  | 3.7           | 86   | 3.6           | 77   | 3.6               | 105  | 3.4           | 101  |
| FTY720                            | 0.6            | -53  | 0.5           | -56  | 0.6           | -37  | 0.5           | -39  | 0.6               | 10   | 0.5           | -24  |
| GDC-0941                          | 3.0            | 18   | 1.9           | -11  | 2.5           | 6    | 1.8           | -15  | 2.2               | 16   | 1.6           | -3   |
| Gefitinib                         | 3.3            | 18   | 2.6           | -1   | 2.9           | 63   | 3.0           | 67   | 3.1               | 76   | 2.8           | 58   |
| Genistein                         | 3.9            | 137  | 3.1           | 129  | 3.6           | 87   | 3.4           | 84   | 3.3               | 105  | 2.9           | 100  |
| GF 109203X                        | 3.8            | 120  | 1.9           | 9    | 3.1           | 79   | 2.0           | 45   | 3.1               | 82   | 1.7           | 27   |
| GSK1904529A                       | 3.5            | 73   | 3.4           | 71   | 2.5           | 103  | 2.4           | 117  | 4.1               | 83   | 3.8           | 78   |
| GSK690693                         | 4.0            | 96   | 3.7           | 30   | 3.8           | 92   | 3.7           | 67   | 4.4               | 98   | 3.2           | 50   |
| GTP 14564                         | 4.3            | 106  | 4.2           | 119  | 3.7           | 89   | 3.7           | 89   | 3.7               | 98   | 3.6           | 82   |
| GW 441756                         | 3.9            | 143  | 3.1           | 127  | 3.6           | 83   | 3.1           | 54   | 3.2               | 86   | 3.1           | 49   |
| GW 5074                           | 4.1            | 128  | 4.5           | 106  | 3.6           | 100  | 4.1           | 91   | 3.7               | 102  | 4.0           | 93   |
| GW 583340 dihydrochloride         | 4.2            | 53   | 3.3           | 30   | 3.0           | 88   | 2.8           | 76   | 3.1               | 78   | 2.5           | 80   |
| H-7 dihydrochloride               | 4.2            | 137  | 4.4           | 111  | 4.2           | 91   | 4.3           | 97   | 3.6               | 98   | 3.9           | 111  |
| H-9 dihydrochloride               | 4.1            | 130  | 4.2           | 130  | 3.7           | 91   | 3.8           | 90   | 3.6               | 111  | 3.9           | 103  |
| HA 1100 hydrochloride             | 4.0            | 114  | 4.2           | 133  | 3.8           | 88   | 4.2           | 89   | 3.7               | 100  | 3.9           | 87   |
| IC87114                           | 3.8            | 111  | 3.9           | 94   | 3.6           | 84   | 3.6           | 88   | 3.4               | 107  | 3.1           | 116  |
| Imatinib mesylate                 | 3.8            | 107  | 3.5           | 100  | 2.4           | 121  | 2.5           | 128  | 3.0               | 124  | 2.7           | 118  |
| IMD 0354                          | 2.0            | 42   | 1.4           | -41  | 2.2           | 84   | 1.2           | -35  | 1.7               | 39   | 1.1           | -17  |
| INCA-6                            | 3.9            | 121  | 3.4           | 80   | 3.7           | 80   | 3.0           | 85   | 3.4               | 96   | 2.4           | 79   |

| Compound Name                         | EGF (20 ng/ml) |      |               |      | HGF (4 ng/ml) |      |               |      | IGF-1 (150 ng/ml) |      |               |      |
|---------------------------------------|----------------|------|---------------|------|---------------|------|---------------|------|-------------------|------|---------------|------|
|                                       | Cpd (1.67 µM)  |      | Cpd (6.67 µM) |      | Cpd (1.67 µM) |      | Cpd (6.67 µM) |      | Cpd (1.67 µM)     |      | Cpd (6.67 µM) |      |
|                                       | CCR            | CDR% | CCR           | CDR% | CCR           | CDR% | CCR           | CDR% | CCR               | CDR% | CCR           | CDR% |
| Indirubin-3'-oxime                    | 3.5            | 116  | 2.4           | 33   | 3.6           | 80   | 2.1           | 15   | 3.5               | 74   | 1.7           | 3    |
| Indomethacin                          | 3.8            | 121  | 4.1           | 129  | 3.7           | 81   | 3.7           | 89   | 3.6               | 108  | 3.4           | 102  |
| Ionomycin free acid                   | 4.1            | 113  | 3.6           | 102  | 3.9           | 94   | 3.2           | 117  | 3.3               | 92   | 2.8           | 89   |
| JNJ28871063 HCl                       | 3.1            | 79   | 3.2           | 44   | 2.3           | 118  | 2.3           | 106  | 3.4               | 107  | 3.2           | 86   |
| JNJ38877605                           | 3.8            | 107  | 3.5           | 110  | 2.6           | 2    | 2.6           | 3    | 3.4               | 77   | 3.4           | 72   |
| JNJ7706621                            | 1.6            | 64   | 1.1           | 1    | 1.4           | 70   | 1.1           | 40   | 1.7               | 93   | 1.0           | 19   |
| K252a                                 | 0.8            | -33  | 0.3           | -47  | 0.8           | -33  | 0.3           | -44  | 0.7               | -14  | 0.3           | -23  |
| Kenpauillone                          | 4.2            | 132  | 3.0           | 15   | 3.8           | 73   | 2.8           | 24   | 3.7               | 67   | 2.8           | 21   |
| Ki 20227                              | 3.9            | 119  | 2.2           | 105  | 3.3           | 89   | 2.6           | 87   | 3.3               | 108  | 2.7           | 88   |
| Ki 8751                               | 1.8            | 100  | 0.9           | 21   | 1.5           | 111  | 0.9           | 70   | 1.7               | 97   | 0.9           | 27   |
| KN-62                                 | 4.1            | 110  | 4.3           | 124  | 4.1           | 92   | 3.8           | 126  | 3.5               | 90   | 3.5           | 107  |
| KT 5720                               | 4.1            | 121  | 4.3           | 123  | 4.0           | 93   | 3.9           | 102  | 3.6               | 96   | 3.6           | 118  |
| KT 5823                               | 4.0            | 130  | 3.9           | 125  | 3.8           | 80   | 3.8           | 82   | 3.6               | 104  | 3.6           | 111  |
| KU 0063794                            | 1.7            | 58   | 1.5           | 37   | 1.9           | 87   | 1.5           | 63   | 2.2               | 48   | 1.5           | 61   |
| KU 55933                              | 3.2            | 84   | 2.3           | 45   | 3.1           | 102  | 2.1           | 128  | 3.8               | 90   | 2.3           | 68   |
| Lapatinib Ditosylate                  | 3.9            | 44   | 3.4           | 31   | 2.7           | 71   | 2.7           | 79   | 3.0               | 86   | 2.4           | 75   |
| Lavendustin A                         | 4.2            | 109  | 4.2           | 118  | 4.0           | 97   | 3.9           | 112  | 3.6               | 89   | 3.5           | 100  |
| LFM-A13                               | 3.9            | 136  | 4.0           | 143  | 3.7           | 96   | 3.9           | 99   | 3.4               | 102  | 3.5           | 94   |
| L-NMMA acetate                        | 3.9            | 125  | 4.3           | 120  | 3.7           | 77   | 3.9           | 89   | 3.6               | 96   | 3.6           | 116  |
| LY 294002 hydrochloride               | 3.5            | 126  | 2.8           | 91   | 3.4           | 76   | 2.7           | 56   | 3.2               | 92   | 2.8           | 68   |
| LY 303511                             | 3.6            | 125  | 3.1           | 93   | 3.6           | 89   | 3.2           | 69   | 3.5               | 96   | 3.1           | 77   |
| LY 364947                             | 4.3            | 44   | 3.7           | 34   | 3.2           | 36   | 2.8           | 16   | 3.5               | 42   | 2.8           | 28   |
| Masatinib                             | 3.8            | 114  | 2.8           | 107  | 3.4           | 88   | 2.2           | 109  | 3.1               | 107  | 2.4           | 102  |
| Merck-5                               | 2.1            | 109  | 1.2           | 61   | 1.9           | 64   | 1.0           | 15   | 2.1               | 77   | 1.1           | 38   |
| Metformin (1,1-Dimethylbiguanide HCl) | 3.7            | 89   | 3.7           | 85   | 2.5           | 121  | 2.3           | 116  | 4.0               | 107  | 4.0           | 105  |
| Methyl 2,5-dihydroxycinnamate         | 3.6            | 133  | 2.9           | 87   | 3.1           | 74   | 2.7           | 70   | 2.7               | 68   | 2.4           | 62   |
| MK-2206                               | 3.8            | 73   | 2.7           | 35   | 3.4           | 109  | 2.8           | 53   | 3.8               | 104  | 2.7           | 44   |
| ML 9 hydrochloride                    | 4.0            | 117  | 3.6           | 92   | 3.6           | 87   | 3.9           | 86   | 3.5               | 100  | 3.2           | 92   |
| Monensin                              | 2.4            | 11   | 1.0           | -39  | 2.9           | 21   | 1.1           | -32  | 2.6               | 30   | 1.1           | -8   |
| Motesanib                             | 3.9            | 115  | 4.1           | 117  | 3.1           | 88   | 2.6           | 117  | 3.1               | 113  | 3.0           | 115  |
| MS-275                                | 2.2            | 33   | 1.1           | -27  | 2.1           | 101  | 1.2           | -10  | 2.2               | 60   | 1.2           | 7    |
| Nigericin                             | 1.4            | -30  | 0.5           | -49  | 2.2           | -1   | 0.6           | -41  | 1.5               | -3   | 0.6           | -12  |
| Nilotinib                             | 3.8            | 112  | 2.8           | 64   | 2.4           | 115  | 2.8           | 105  | 2.8               | 135  | 2.6           | 94   |
| NPC 15437 dihydrochloride             | 4.1            | 106  | 3.2           | 59   | 4.1           | 105  | 3.9           | 79   | 3.3               | 98   | 3.1           | 51   |
| NSC 625987                            | 4.3            | 116  | 3.8           | 138  | 4.0           | 98   | 3.9           | 91   | 3.6               | 97   | 3.6           | 94   |
| NSC 693868                            | 4.0            | 130  | 4.1           | 124  | 3.6           | 89   | 3.9           | 92   | 3.4               | 96   | 3.7           | 98   |
| Olomoucine                            | 4.2            | 133  | 4.2           | 127  | 3.7           | 90   | 3.8           | 92   | 3.6               | 95   | 3.7           | 117  |
| Pazopanib HCl                         | 3.4            | 80   | 1.1           | 0    | 2.6           | 125  | 1.0           | 26   | 3.0               | 99   | 1.1           | 31   |
| PD 0325901                            | 2.3            | 1    | 2.0           | -9   | 2.2           | 20   | 2.0           | 8    | 2.0               | 35   | 1.8           | 28   |
| PD 153035 hydrochloride               | 2.6            | 8    | 2.4           | -8   | 2.8           | 64   | 2.6           | 38   | 3.0               | 75   | 2.8           | 52   |
| PD 158780                             | 3.2            | 41   | 2.3           | 15   | 2.9           | 76   | 2.7           | 64   | 3.1               | 78   | 2.5           | 59   |
| PD 173955                             | 2.0            | -11  | 0.9           | -40  | 2.3           | 10   | 0.9           | -37  | 1.8               | 8    | 0.9           | -13  |
| PD 173955-Analog1                     | 2.1            | 53   | 1.1           | -35  | 2.8           | 92   | 1.3           | -34  | 2.3               | 83   | 1.2           | 6    |
| PD 198306                             | 3.7            | 51   | 1.8           | -15  | 2.9           | 51   | 1.9           | 9    | 2.9               | 51   | 1.6           | 25   |
| PD 407824                             | 1.5            | -8   | 1.2           | -27  | 1.5           | -5   | 1.1           | -24  | 1.4               | 4    | 1.0           | -9   |
| PD 98059                              | 4.4            | 105  | 4.5           | 98   | 3.8           | 80   | 3.6           | 70   | 3.8               | 84   | 3.5           | 66   |
| Perifosine                            | 3.5            | 88   | 3.5           | 82   | 2.6           | 115  | 2.3           | 113  | 4.1               | 119  | 0.9           | -9   |
| PF-04217903                           | 3.8            | 97   | 3.8           | 112  | 2.7           | 6    | 2.7           | 2    | 3.5               | 58   | 3.5           | 73   |
| PF-2341066                            | 3.3            | 85   | 1.1           | 37   | 2.9           | 9    | 1.1           | -21  | 3.5               | 68   | 1.1           | 17   |
| PF-431396                             | 1.3            | 99   | 1.1           | 2    | 1.2           | 33   | 1.0           | -6   | 1.2               | 49   | 0.9           | 1    |
| PF-562271                             | 2.0            | 83   | 1.3           | 18   | 2.1           | 64   | 1.1           | 16   | 2.2               | 68   | 1.0           | 13   |
| PHA665752                             | 3.7            | 104  | 1.0           | -59  | 2.3           | 4    | 1.0           | -56  | 3.3               | 65   | 0.7           | -31  |
| Phorbol 12-myristate 13-acetate       | 2.1            | 110  | 2.3           | 107  | 1.6           | 95   | 1.6           | 106  | 1.6               | 119  | 1.8           | 105  |
| PI-103                                | 1.8            | 3    | 1.6           | -12  | 1.7           | -4   | 1.5           | -6   | 1.5               | 9    | 1.4           | -2   |
| Piceatannol                           | 4.0            | 97   | 3.8           | 126  | 3.8           | 74   | 3.6           | 94   | 3.7               | 90   | 3.3           | 86   |
| PIK-75                                | 0.5            | -45  | 0.5           | -45  | 0.5           | -40  | 0.5           | -42  | 0.6               | -18  | 0.5           | -18  |
| PIK-90                                | 2.6            | 17   | 2.6           | 17   | 2.3           | 21   | 2.2           | 5    | 2.4               | 29   | 1.9           | 12   |
| PIK-93                                | 3.1            | 74   | 2.1           | 54   | 3.3           | 79   | 2.5           | 45   | 2.2               | 107  | 1.9           | 59   |

| Compound Name                | EGF (20 ng/ml) |      |               |      | HGF (4 ng/ml) |      |               |      | IGF-1 (150 ng/ml) |      |               |      |
|------------------------------|----------------|------|---------------|------|---------------|------|---------------|------|-------------------|------|---------------|------|
|                              | Cpd (1.67 µM)  |      | Cpd (6.67 µM) |      | Cpd (1.67 µM) |      | Cpd (6.67 µM) |      | Cpd (1.67 µM)     |      | Cpd (6.67 µM) |      |
|                              | CCR            | CDR% | CCR           | CDR% | CCR           | CDR% | CCR           | CDR% | CCR               | CDR% | CCR           | CDR% |
| PLX4720                      | 3.7            | 98   | 4.0           | 73   | 2.4           | 110  | 2.9           | 99   | 2.7               | 110  | 2.9           | 86   |
| PP 1                         | 3.8            | 47   | 2.8           | 11   | 3.1           | 34   | 1.9           | 5    | 3.1               | 25   | 1.8           | -4   |
| PP 2                         | 3.5            | 98   | 2.8           | 20   | 3.4           | 55   | 2.3           | 1    | 3.4               | 47   | 2.4           | 6    |
| PP 3                         | 3.9            | 125  | 3.9           | 116  | 3.7           | 86   | 3.6           | 85   | 3.4               | 109  | 3.6           | 100  |
| PQ401                        | 3.8            | 107  | 2.8           | 74   | 3.8           | 77   | 3.3           | 75   | 3.6               | 96   | 2.9           | 105  |
| Procainamide HCl             | 3.7            | 92   | 3.7           | 87   | 2.9           | 122  | 2.3           | 120  | 4.1               | 105  | 3.9           | 111  |
| Procaine HCl                 | 3.8            | 87   | 3.7           | 93   | 2.6           | 127  | 2.4           | 104  | 4.0               | 118  | 3.9           | 115  |
| Prostaglandin E2             | 4.0            | 117  | 4.1           | 104  | 3.7           | 80   | 3.7           | 84   | 3.5               | 100  | 3.6           | 109  |
| Purvalanol A                 | 3.9            | 127  | 2.3           | 37   | 3.8           | 78   | 2.2           | -2   | 3.4               | 79   | 1.9           | 0    |
| Purvalanol B                 | 4.1            | 139  | 3.9           | 138  | 3.9           | 88   | 3.8           | 85   | 3.5               | 97   | 3.7           | 108  |
| R1487                        | 2.9            | 107  | 3.1           | 105  | 3.7           | 56   | 3.6           | 50   | 3.8               | 72   | 3.0           | 61   |
| R59-022                      | 3.9            | 102  | 4.0           | 105  | 3.8           | 86   | 3.8           | 78   | 3.5               | 99   | 3.5           | 85   |
| Rapamycin                    | 2.7            | 96   | 2.8           | 98   | 2.4           | 52   | 2.5           | 63   | 2.0               | 74   | 2.0           | 85   |
| Resveratrol                  | 3.8            | 121  | 4.4           | 126  | 3.9           | 92   | 3.9           | 90   | 3.6               | 99   | 3.6           | 112  |
| Retinoic acid                | 4.0            | 99   | 4.1           | 103  | 3.4           | 72   | 3.4           | 70   | 3.3               | 69   | 3.4           | 82   |
| RG108                        | 3.4            | 110  | 3.6           | 98   | 2.3           | 113  | 2.3           | 111  | 3.8               | 117  | 3.9           | 107  |
| RHO-15                       | 4.4            | 110  | 4.0           | 115  | 4.0           | 101  | 4.0           | 98   | 3.7               | 114  | 3.7           | 117  |
| Ro 08-2750                   | 3.6            | 127  | 1.6           | 36   | 3.2           | 88   | 1.6           | 49   | 2.8               | 95   | 1.1           | 22   |
| Ro 106-9920                  | 3.1            | 98   | 1.1           | -43  | 2.6           | 94   | 0.9           | -40  | 1.8               | 62   | 0.9           | -20  |
| Ro 31-8220 mesylate          | 1.1            | -20  | 0.9           | -43  | 1.0           | 0    | 0.9           | -36  | 0.8               | -8   | 0.8           | -19  |
| Rottlerin                    | 3.4            | 162  | 1.5           | -20  | 2.0           | 121  | 1.4           | -5   | 2.7               | 107  | 1.3           | -9   |
| RWJ-67657                    | 2.9            | 112  | 3.1           | 114  | 3.2           | 53   | 3.1           | 43   | 3.2               | 66   | 3.1           | 46   |
| Ryuvidine                    | 1.1            | -31  | 0.8           | -43  | 1.1           | -19  | 0.7           | -42  | 0.7               | -18  | 0.7           | -19  |
| SB 1518                      | 2.1            | 65   | 0.5           | -52  | 1.9           | 94   | 0.5           | -46  | 2.2               | 45   | 0.6           | -23  |
| SB 202190                    | 3.2            | 132  | 2.8           | 147  | 2.4           | 117  | 2.1           | 109  | 2.7               | 129  | 2.6           | 111  |
| SB 203580                    | 3.3            | 135  | 2.8           | 155  | 2.7           | 107  | 2.1           | 118  | 3.0               | 115  | 2.6           | 115  |
| SB 203580 hydrochloride      | 3.6            | 122  | 3.0           | 132  | 2.4           | 119  | 2.0           | 121  | 3.1               | 94   | 2.8           | 97   |
| SB 216763                    | 3.4            | 144  | 3.6           | 100  | 3.4           | 75   | 3.0           | 69   | 3.3               | 106  | 3.2           | 85   |
| SB 239063                    | 3.6            | 126  | 3.7           | 124  | 3.4           | 66   | 3.2           | 51   | 3.6               | 84   | 3.5           | 70   |
| SB 242235                    | 2.7            | 113  | 2.9           | 121  | 3.8           | 65   | 3.5           | 52   | 3.4               | 66   | 3.1           | 55   |
| SB 415286                    | 3.9            | 132  | 3.8           | 154  | 3.3           | 108  | 2.7           | 114  | 3.2               | 113  | 3.2           | 122  |
| SB 431542                    | 4.3            | 47   | 3.7           | 28   | 3.7           | 43   | 3.5           | 26   | 3.7               | 43   | 3.5           | 28   |
| SB 590885                    | 4.1            | 69   | 0.7           | -45  | 4.0           | 94   | 0.6           | -42  | 4.0               | 112  | 0.6           | -15  |
| SC-10                        | 3.9            | 121  | 4.2           | 118  | 3.6           | 86   | 3.6           | 81   | 3.5               | 112  | 3.6           | 108  |
| SC-9                         | 4.0            | 123  | 4.6           | 111  | 3.8           | 81   | 3.8           | 84   | 3.5               | 100  | 3.5           | 106  |
| SD-06                        | 2.6            | 112  | 2.2           | 127  | 3.6           | 58   | 3.5           | 70   | 3.1               | 61   | 3.5           | 73   |
| SD-169                       | 4.0            | 115  | 3.9           | 115  | 3.5           | 89   | 3.1           | 88   | 3.3               | 107  | 3.4           | 97   |
| SD-208                       | 3.6            | 25   | 3.5           | 28   | 3.0           | 23   | 2.6           | 16   | 3.5               | 29   | 3.1           | 25   |
| SKF 86002 dihydrochloride    | 3.6            | 124  | 3.8           | 134  | 3.7           | 74   | 3.4           | 69   | 3.6               | 98   | 3.7           | 91   |
| SKI II                       | 3.7            | 120  | 3.5           | 84   | 3.6           | 96   | 3.3           | 61   | 3.6               | 84   | 3.0           | 38   |
| SL 327                       | 3.9            | 103  | 3.7           | 38   | 3.5           | 61   | 3.2           | 45   | 3.4               | 62   | 3.2           | 50   |
| SNS-032                      | 1.0            | -20  | 0.9           | -37  | 1.0           | -11  | 0.9           | -30  | 0.9               | 4    | 0.9           | 24   |
| SNS-314                      | 1.1            | 64   | 1.1           | 16   | 1.0           | 92   | 1.1           | 54   | 1.1               | 61   | 1.1           | 41   |
| Sodfrum 4-Phenylbutyrate     | 3.6            | 91   | 3.8           | 84   | 2.4           | 121  | 2.6           | 97   | 4.2               | 113  | 4.2           | 104  |
| Sorafenib Tosylate           | 4.2            | 89   | 2.4           | 17   | 3.1           | 115  | 2.3           | 68   | 4.1               | 121  | 2.4           | 52   |
| SP 600125                    | 3.7            | 157  | 3.4           | 128  | 3.5           | 77   | 3.3           | 62   | 3.4               | 101  | 3.4           | 74   |
| SR 3677                      | 4.1            | 100  | 3.8           | 89   | 4.3           | 110  | 3.9           | 94   | 4.4               | 100  | 4.1           | 90   |
| Staurosporine                | 1.8            | 108  | 1.0           | 51   | 1.4           | 124  | 1.0           | 78   | 1.1               | 86   | 0.7           | 35   |
| STK368014 (Amicarbalide)     | 3.1            | 93   | 3.9           | 80   | 2.5           | 107  | 2.5           | 104  | 3.4               | 103  | 3.9           | 107  |
| STO-609 acetate              | 3.8            | 111  | 4.3           | 126  | 3.7           | 82   | 3.8           | 86   | 3.6               | 103  | 3.4           | 120  |
| SU 11274                     | 3.3            | 93   | 1.3           | 37   | 3.5           | 60   | 1.4           | -7   | 3.8               | 89   | 1.5           | 36   |
| SU 16f                       | 4.5            | 89   | 2.1           | 35   | 3.8           | 62   | 1.9           | 21   | 3.5               | 91   | 2.0           | 30   |
| SU 4312                      | 4.1            | 127  | 4.0           | 102  | 3.8           | 94   | 3.6           | 67   | 3.6               | 105  | 3.8           | 74   |
| SU 5402                      | 4.0            | 119  | 3.9           | 121  | 3.3           | 94   | 3.4           | 91   | 3.4               | 98   | 3.5           | 96   |
| SU 5416                      | 4.1            | 118  | 3.8           | 122  | 3.8           | 88   | 3.4           | 81   | 3.5               | 102  | 3.5           | 99   |
| SU 6668                      | 3.1            | 98   | 2.9           | 104  | 3.8           | 114  | 3.7           | 78   | 3.8               | 88   | 3.8           | 86   |
| Suberoyl bis-hydroxamic acid | 2.9            | 106  | 2.2           | 89   | 1.9           | 132  | 1.6           | 104  | 2.9               | 132  | 2.0           | 117  |
| Sunitinib                    | 3.5            | 99   | 0.9           | -41  | 3.1           | 41   | 0.9           | -38  | 2.5               | 29   | 1.1           | -13  |

| Compound Name                  | EGF (20 ng/ml) |      |               |      | HGF (4 ng/ml) |      |               |      | IGF-1 (150 ng/ml) |      |               |      |
|--------------------------------|----------------|------|---------------|------|---------------|------|---------------|------|-------------------|------|---------------|------|
|                                | Cpd (1.67 µM)  |      | Cpd (6.67 µM) |      | Cpd (1.67 µM) |      | Cpd (6.67 µM) |      | Cpd (1.67 µM)     |      | Cpd (6.67 µM) |      |
|                                | CCR            | CDR% | CCR           | CDR% | CCR           | CDR% | CCR           | CDR% | CCR               | CDR% | CCR           | CDR% |
| TAK-715                        | 3.2            | 106  | 2.9           | 73   | 3.9           | 97   | 2.7           | 14   | 3.5               | 63   | 2.2           | 27   |
| Tandutinib (MLN518)            | 4.0            | 110  | 3.7           | 96   | 3.5           | 95   | 3.3           | 118  | 3.2               | 113  | 2.9           | 95   |
| TBB                            | 3.8            | 114  | 4.2           | 113  | 3.7           | 82   | 3.6           | 91   | 3.4               | 99   | 3.4           | 109  |
| TCS 359                        | 4.4            | 123  | 3.3           | 72   | 3.9           | 82   | 3.4           | 84   | 3.9               | 98   | 2.6           | 83   |
| Temsirolimus                   | 2.0            | 62   | 1.9           | 51   | 1.8           | 97   | 1.7           | 91   | 2.2               | 100  | 2.1           | 70   |
| TG100115                       | 3.9            | 116  | 3.8           | 113  | 3.4           | 85   | 3.7           | 91   | 3.3               | 104  | 3.4           | 100  |
| TG101209                       | 1.3            | 28   | 0.6           | -7   | 1.3           | 6    | 0.6           | 12   | 1.2               | -1   | 0.6           | -11  |
| TG101209-Derivative 1          | 1.3            | 65   | 1.2           | -9   | 1.2           | 39   | 1.0           | -25  | 1.3               | 34   | 1.0           | -7   |
| TG101209-Derivative 2          | 1.2            | 28   | 0.9           | -36  | 1.2           | 20   | 0.8           | -13  | 1.2               | 11   | 0.9           | -14  |
| TG101348                       | 1.8            | 34   | 0.7           | -35  | 1.7           | 16   | 0.7           | -9   | 1.6               | 8    | 0.7           | -16  |
| TGX221                         | 3.6            | 106  | 2.9           | 102  | 3.3           | 80   | 2.7           | 106  | 2.7               | 115  | 2.5           | 122  |
| TPCA-1                         | 3.5            | 106  | 1.3           | 57   | 3.4           | 85   | 1.3           | 23   | 3.2               | 90   | 1.2           | 15   |
| Tyrphostin B44, (-) enantiomer | 3.9            | 131  | 3.7           | 102  | 3.8           | 98   | 3.2           | 102  | 3.3               | 114  | 2.7           | 106  |
| Tyrphostin B44, (+) enantiomer | 4.0            | 109  | 3.7           | 100  | 3.8           | 75   | 3.3           | 80   | 3.7               | 93   | 2.7           | 105  |
| U0126                          | 4.0            | 88   | 3.2           | 24   | 3.4           | 65   | 3.1           | 45   | 3.1               | 55   | 2.9           | 48   |
| Valproic acid, Na salt         | 3.9            | 93   | 3.8           | 89   | 2.5           | 132  | 2.4           | 124  | 4.0               | 113  | 4.0           | 115  |
| Vandetanib                     | 2.9            | 122  | 2.9           | 11   | 3.0           | 65   | 2.8           | 44   | 3.0               | 65   | 2.6           | 32   |
| Vargatef                       | 3.1            | 38   | 0.5           | -60  | 2.7           | 32   | 0.5           | -53  | 2.1               | 6    | 0.5           | -29  |
| Vorinostat (SAHA)              | 1.1            | 18   | 0.7           | -31  | 1.1           | 45   | 0.7           | -6   | 1.1               | 50   | 0.7           | -8   |
| VX-680                         | 1.3            | 111  | 1.3           | 102  | 1.0           | 73   | 1.2           | 64   | 1.2               | 75   | 1.2           | 34   |
| VX-702                         | 4.0            | 104  | 3.8           | 106  | 3.8           | 89   | 3.7           | 110  | 3.6               | 95   | 3.6           | 103  |
| W-7 hydrochloride              | 4.0            | 116  | 3.8           | 108  | 3.8           | 91   | 3.1           | 112  | 3.5               | 100  | 3.2           | 92   |
| WHI-P 154                      | 3.0            | 27   | 2.3           | -5   | 3.0           | 71   | 2.7           | 51   | 3.1               | 77   | 2.8           | 55   |
| Wortmannin                     | 3.5            | 94   | 3.4           | 103  | 3.5           | 93   | 3.0           | 91   | 2.9               | 93   | 2.5           | 84   |
| XAV939                         | 3.3            | 77   | 3.2           | 72   | 2.3           | 115  | 2.5           | 110  | 3.9               | 91   | 3.7           | 72   |
| XL-147                         | 3.6            | 94   | 3.4           | 72   | 2.5           | 122  | 2.6           | 118  | 4.1               | 97   | 3.8           | 85   |
| Y-27632 dihydrochloride        | 4.3            | 95   | 4.0           | 104  | 4.2           | 104  | 4.2           | 115  | 3.6               | 84   | 3.6           | 92   |
| YM 201636                      | 3.8            | 97   | 2.5           | 20   | 3.3           | 76   | 2.3           | 3    | 3.0               | 93   | 1.4           | -6   |
| ZM 306416 hydrochloride        | 3.9            | 68   | 2.4           | -1   | 2.9           | 65   | 2.5           | 47   | 3.1               | 73   | 2.7           | 52   |
| ZM 323881 hydrochloride        | 3.3            | 118  | 4.0           | 117  | 3.9           | 94   | 3.9           | 88   | 3.5               | 101  | 3.6           | 102  |
| ZM 336372                      | 4.4            | 124  | 4.7           | 96   | 3.3           | 119  | 4.0           | 111  | 3.5               | 110  | 3.6           | 100  |
| ZM 39923 hydrochloride         | 4.1            | 133  | 3.9           | 119  | 3.7           | 83   | 3.5           | 93   | 3.5               | 106  | 3.5           | 95   |
| ZM 447439                      | 1.3            | 83   | 1.2           | 11   | 1.2           | 38   | 0.9           | -16  | 1.2               | 62   | 1.0           | 15   |
| ZM 449829                      | 4.1            | 116  | 4.3           | 118  | 3.7           | 83   | 3.8           | 90   | 3.5               | 107  | 3.5           | 106  |
| ZSTK474                        | 2.3            | 17   | 1.5           | -9   | 2.2           | 9    | 1.6           | 2    | 2.1               | 20   | 1.5           | 6    |
