# Supplementary material for: A Cell-Based Small Molecule Screening Method for Identifying Inhibitors of Epithelial-Mesenchymal Transition in Carcinoma
Source: PubMed Central journal article supplement (PMC3303807; doi:10.1371/journal.pone.0033183), 2012-03-14
Supplement: pone.0033183.s004.pdf [file pone.0033183.s004.pdf]

**Table S2**

| A83-01 : JNJ-38877605<br>combination ratio | 50% CI | 75% CI |
|--------------------------------------------|--------|--------|
| 1:4                                        | 0.63   | 0.41   |
| 1:2                                        | 0.67   | 0.34   |
| 1:1                                        | 0.47   | 0.23   |
| 3:1                                        | 0.33   | 0.13   |
